# Supplementary material
Source: Springer Nature journal article supplement (https://www.springermedizin.de/resource/supplementary/12937_2013_757_MOESM7_ESM.pdf/25653992)

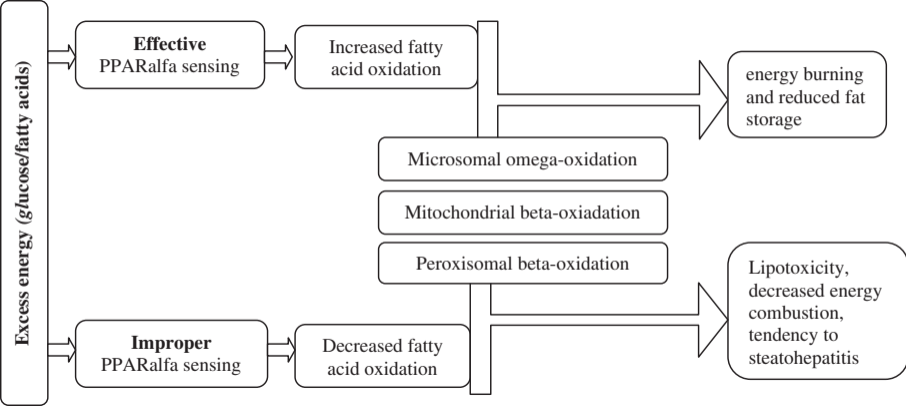

Supplement: MOESM7 [file 25653992]
